# Supplementary material for: Preclinical Development of a Bacteriophage Cocktail for Treating Multidrug Resistant Pseudomonas aeruginosa Infections
Source: MDPI journal article supplement (doi:10.3390/microorganisms9092001), 2021-09-21
Supplement: s1 [file s1]

## Supplementary Materials

**Table S1. Fifteen *P. aeruginosa* Bacteriophages Initial Titer.**

| Table 1. Titer (PFU mL <sup>-1</sup> ) of isolated phage stock solution |                           |                           |                           |                           |                           |                           |                           |                            |                            |                            |                           |                            |                             |                          |
|-------------------------------------------------------------------------|---------------------------|---------------------------|---------------------------|---------------------------|---------------------------|---------------------------|---------------------------|----------------------------|----------------------------|----------------------------|---------------------------|----------------------------|-----------------------------|--------------------------|
| Phages                                                                  | PA1                       | PA2                       | PA3                       | PA4                       | PA5                       | PA6                       | PA7                       | PA8                        | PA9                        | PA10                       | PA12                      | PA13                       | PA14                        | PA15                     |
| Titer<br>(PFU mL <sup>-1</sup> )                                        | 3.78<br>x 10 <sup>8</sup> | 6.56<br>x 10 <sup>8</sup> | 3.33<br>x 10 <sup>8</sup> | 7.56<br>x 10 <sup>9</sup> | 3.56<br>x 10 <sup>9</sup> | 9.22<br>x 10 <sup>8</sup> | 7.33<br>x 10 <sup>6</sup> | 5.56<br>x 10 <sup>10</sup> | 1.67<br>x 10 <sup>10</sup> | 4.11 x<br>10 <sup>10</sup> | 8.67 x<br>10 <sup>9</sup> | 3.11 x<br>10 <sup>10</sup> | 2.167<br>x 10 <sup>10</sup> | 3.22<br>10 <sup>11</sup> |

**Table S2. Antibiotic Resistance of Clinical Isolates.** 9 CF and 11 non-CF clinical isolates were selected to determine the minimum inhibitory concentration (MIC) against 5 antibiotics (2 to 64 µg mL<sup>-1</sup>) using 96-well plates in triplicates. Bacterial growth was measured by OD595 nm, n=3.

| Antibiotic Minimum Inhibitory Concentration (µg mL <sup>-1</sup> ) |               |            |          |            |            |
|--------------------------------------------------------------------|---------------|------------|----------|------------|------------|
| <i>P. aeruginosa</i><br>Strain                                     | Ciprofloxacin | Gentamicin | Imipenem | Netilmicin | Tobramycin |
| C450                                                               | 4             | 2          | 2        | 2          | 2          |
| C460                                                               | 16            | 64         | 2        | 64         | 16         |
| C461                                                               | 2             | 4          | 2        | 8          | 2          |
| C453                                                               | 2             | 8          | 4        | 16         | 2          |
| C458                                                               | 8             | >64        | >64      | >64        | >64        |
| C459                                                               | 4             | 32         | 8        | 64         | 8          |
| C462                                                               | 16            | 8          | 2        | 8          | 2          |
| C452                                                               | 64            | 4          | 2        | 8          | 4          |
| C457                                                               | 2             | 32         | 8        | 64         | 4          |
| C437                                                               | 2             | 16         | 4        | 32         | 2          |
| C420                                                               | 2             | 16         | 4        | 32         | 2          |
| C446                                                               | 2             | 16         | 4        | 4          | 16         |
| C410                                                               | 2             | 8          | 2        | 8          | 2          |
| C413                                                               | 2             | 16         | 4        | 16         | 2          |
| C438                                                               | 2             | 16         | 4        | 16         | 4          |
| C440                                                               | 2             | 8          | 2        | 16         | 2          |
| C433                                                               | 2             | 16         | 4        | 32         | 4          |
| C434                                                               | 2             | 4          | 2        | 2          | 2          |
| C389                                                               | 2             | 4          | 16       | 16         | 2          |
| C423                                                               | 16            | 64         | 8        | >64        | 2          |

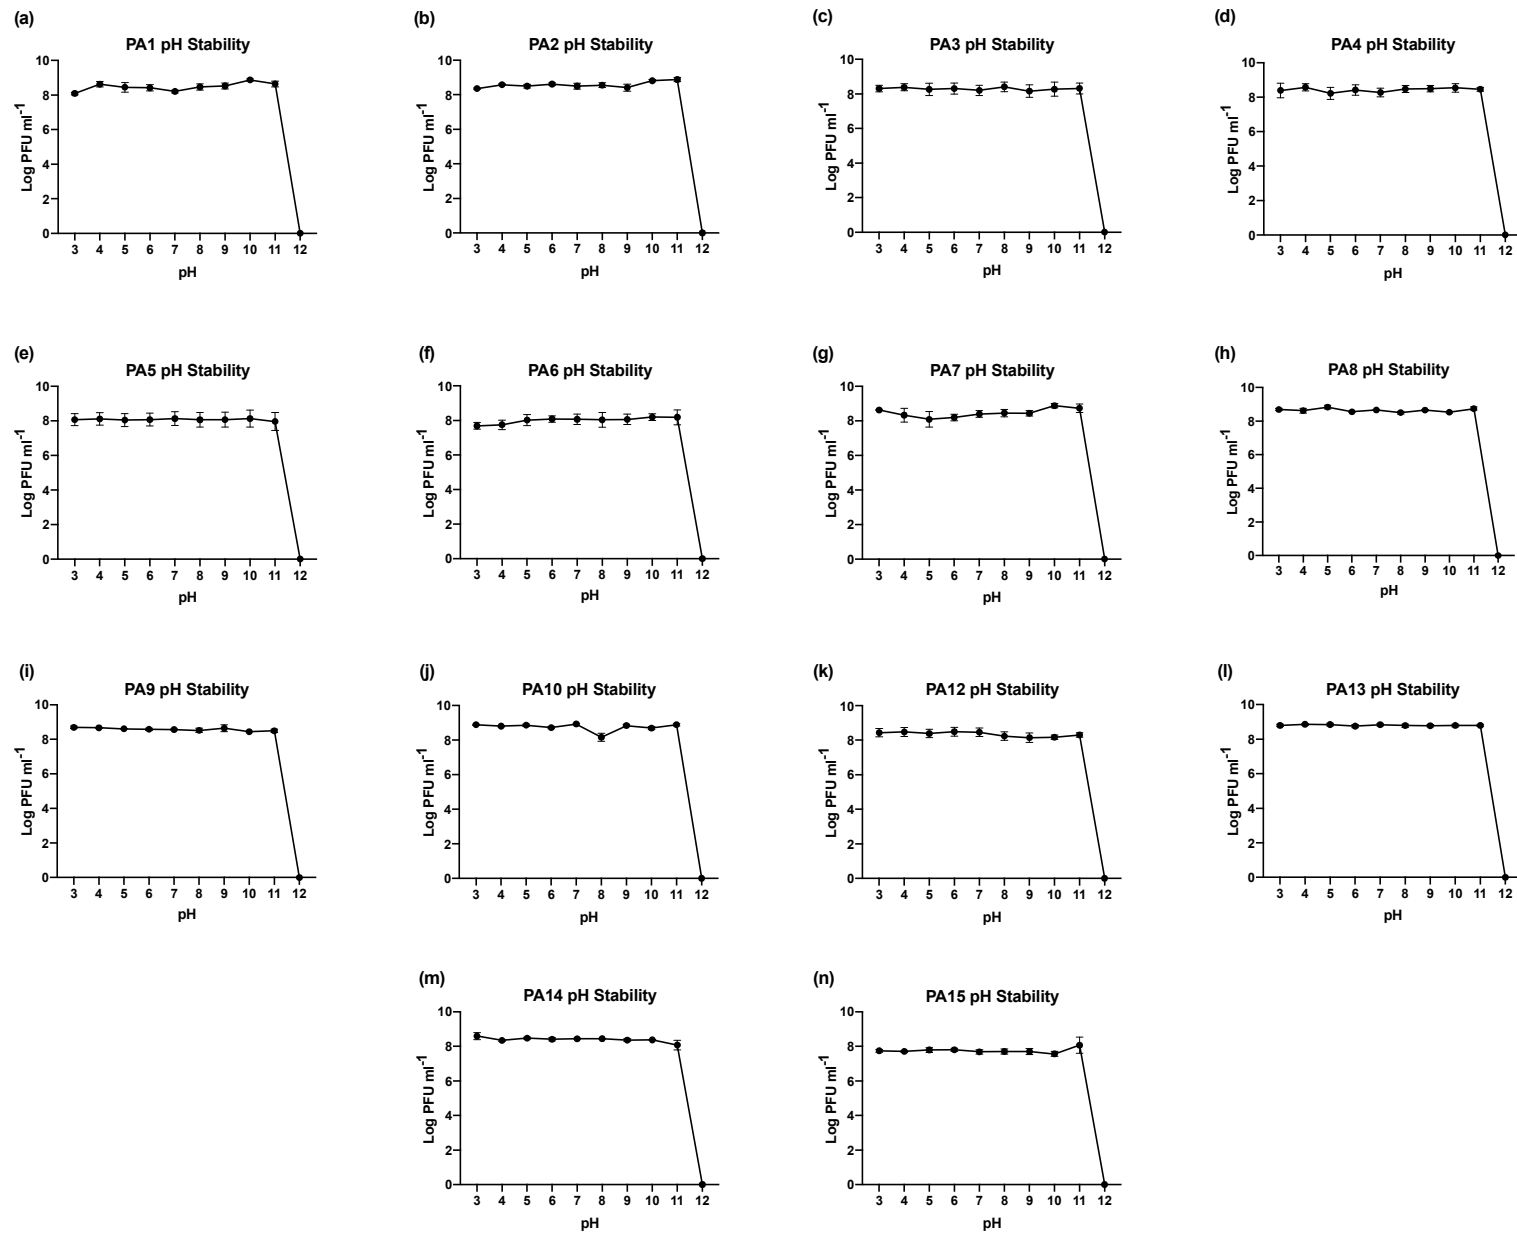

**Figure S1. Bacteriophage pH Stability Test.** Phages were incubated at different pH (3 to 12) conditions with phage titer determined to investigate their stability. Data expressed as mean  $\pm$  SEM for three independent experiments. Significant difference compared to values at pH=7 was determined using One-way ANOVA. \*\*\*\*,  $p < 0.0001$ .

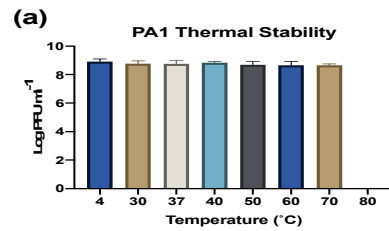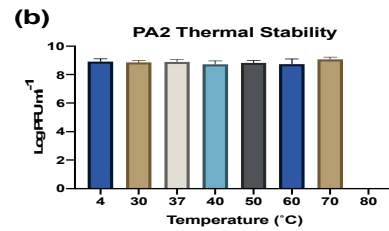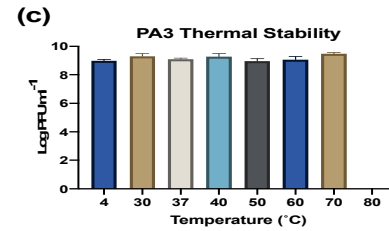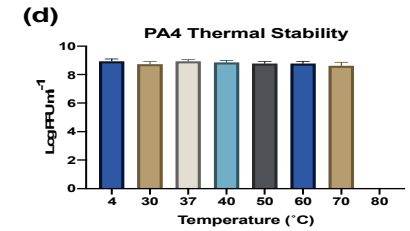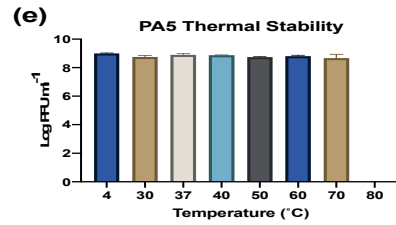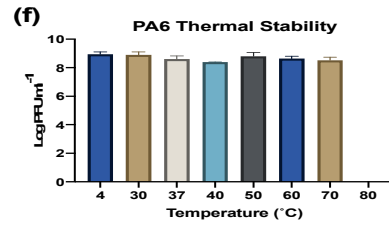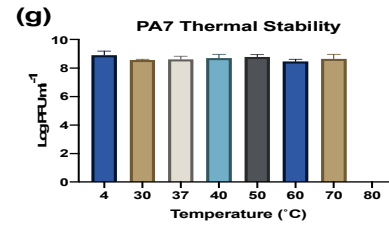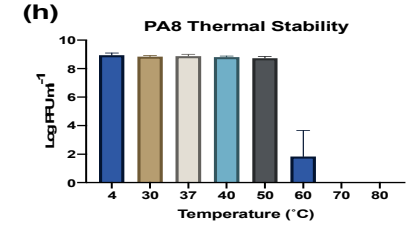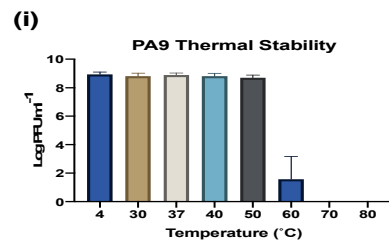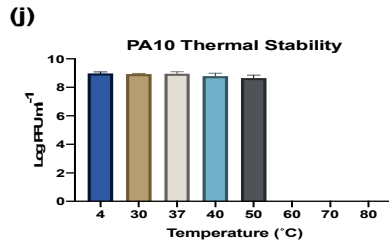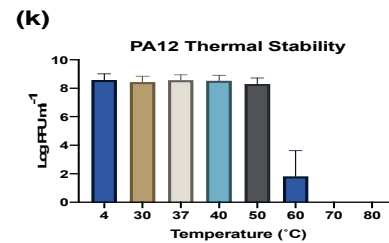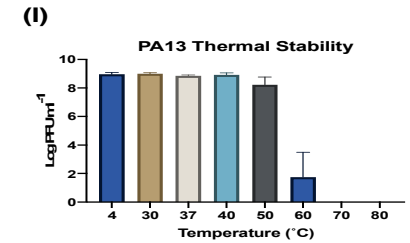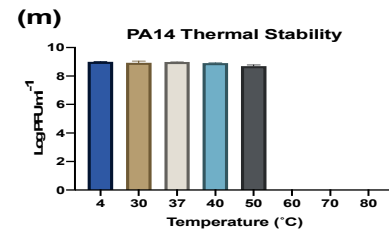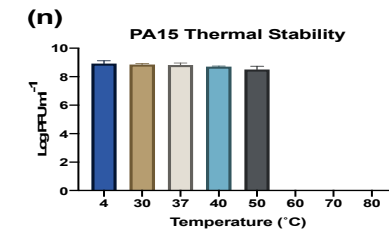

**Figure S2. Bacteriophage Thermal Stability Test.** Stability measured by viability in PFU ml<sup>-1</sup> for phages incubated in temperature conditions ranging between 4°C-80°C for 1 hour. Data expressed as mean ± SEM for three independent experiments. Significant difference compared to 4°C was determined using One-way ANOVA. \*\*\*\*, p<0.0001.

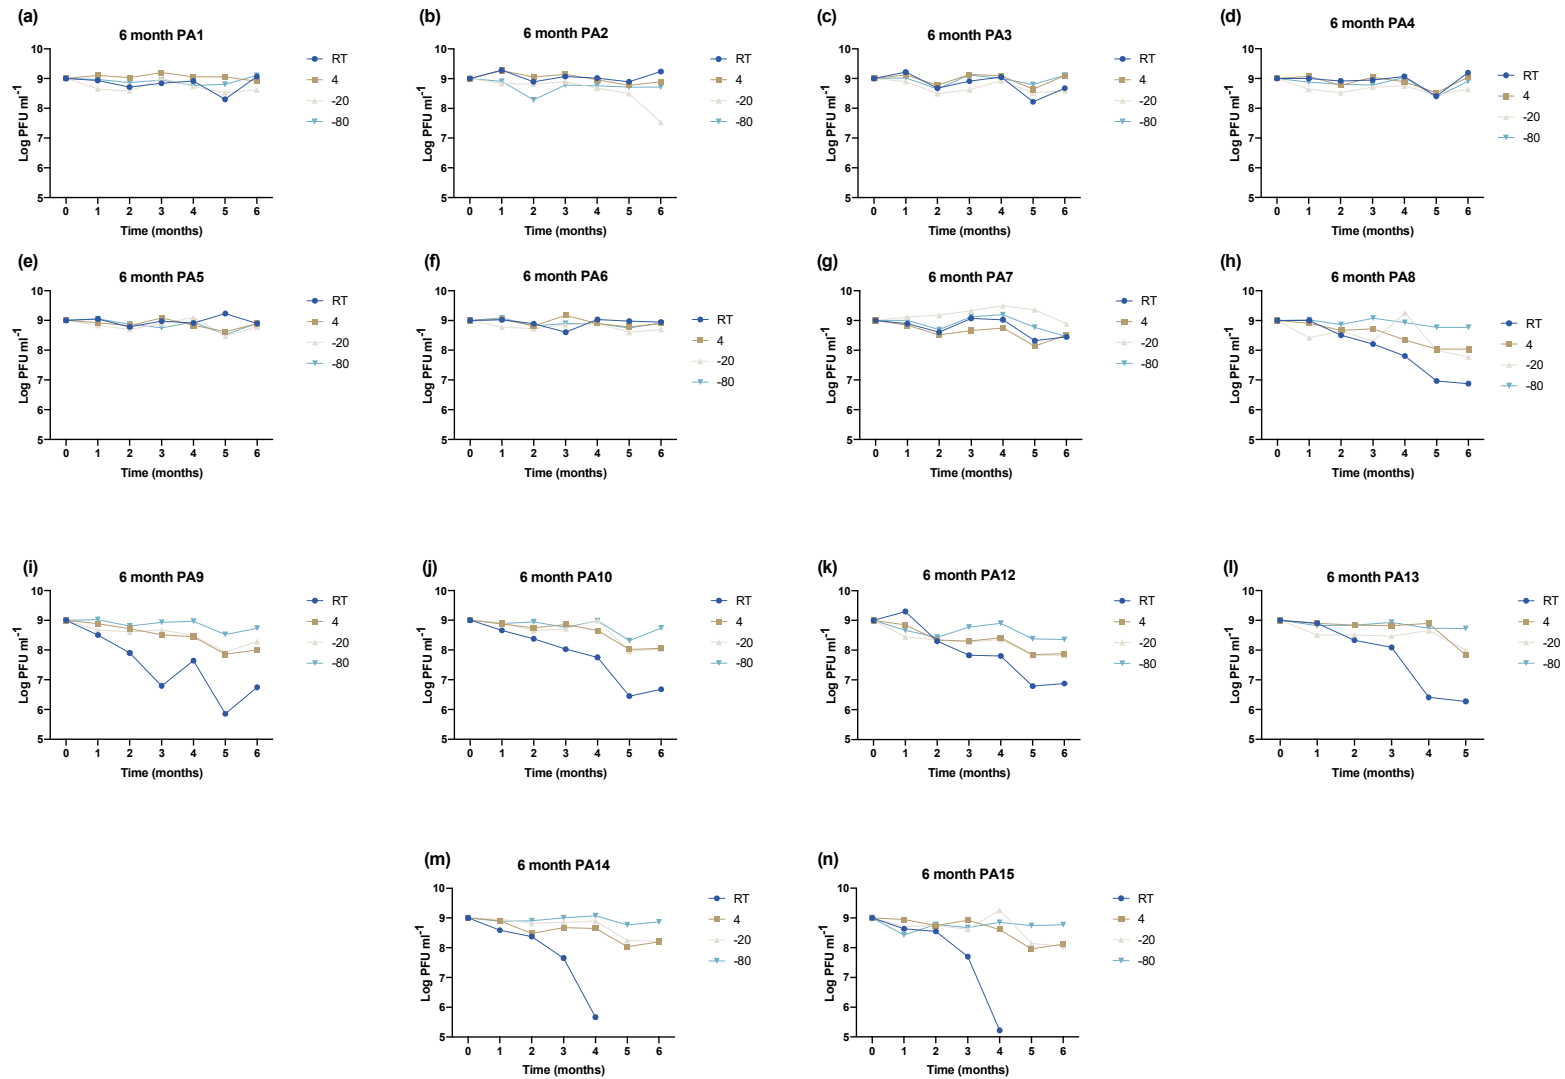

**Figure S3. Bacteriophage Long-term Storage Stability Test.** 6-month long-term stability of phages stored at room temperature (RT), 4°C, -20°C and -80°C.

Data expressed as mean.

## C446 Biofilm Treated with PA4

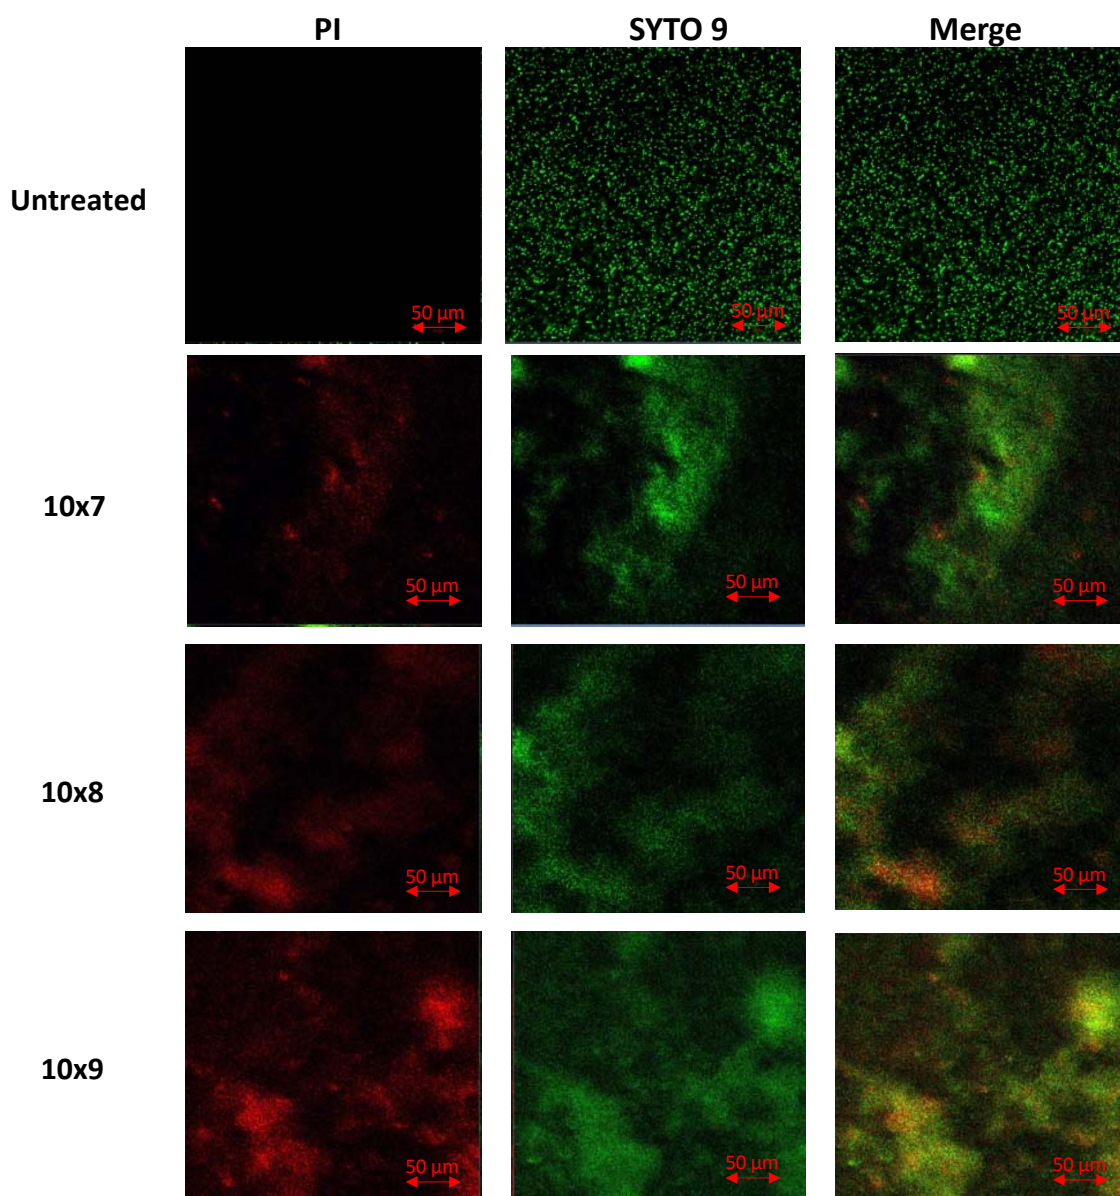

**Figure S4. a) C446 biofilm treated with PA4.**

C446 biofilm treated with PA4 at  $10 \times 7$ ,  $10 \times 8$  and  $10 \times 9$  PFU mL<sup>-1</sup> respectively. Biofilms without treatment (untreated) were used as control. LIVE/DEAD® Bacterial Viability Kit was used showing dead (PI, red) and live (SYTO® 9, green) biofilm associated bacteria in samples representative of each treatment group.

## PA01 Biofilm Treated with PA4

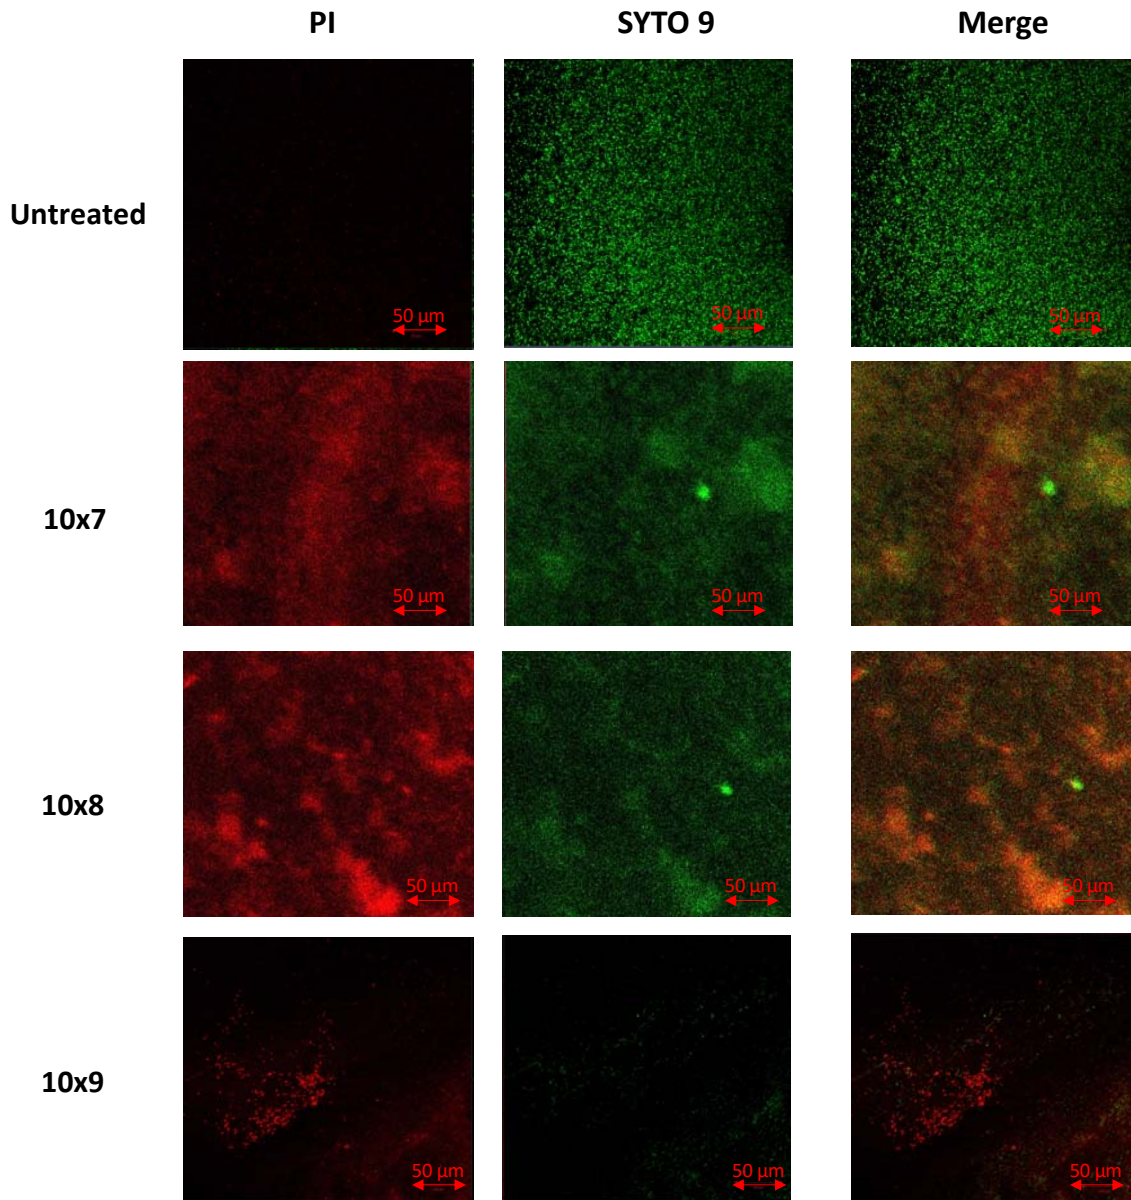

**Figure S4. b) PA01 biofilm treated with PA4.**

PA01 biofilm treated with PA4 at 10x7, 10x8 and 10x9 PFU mL<sup>-1</sup> respectively. Biofilms without treatment (untreated) were used as control. LIVE/DEAD® Bacterial Viability Kit was used showing dead (PI, red) and live (SYTO® 9, green) biofilm associated bacteria in samples representative of each treatment group.



## C462 Biofilm Treated with PA4

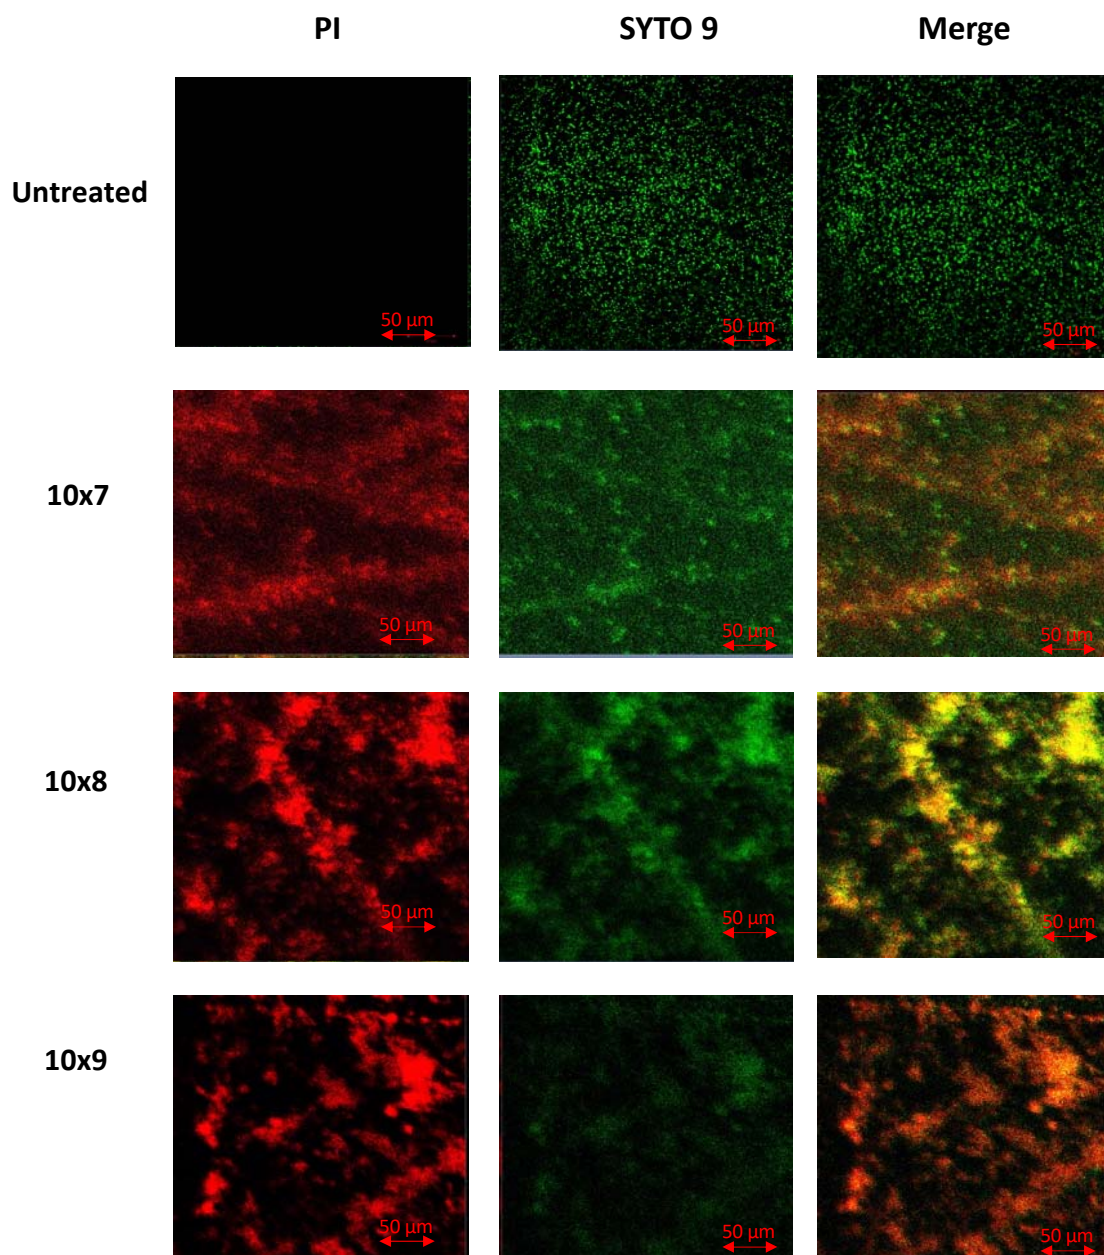

**Figure S4. c) C462 biofilm treated with PA4.**

C462 biofilm treated with PA4 at  $10 \times 7$ ,  $10 \times 8$  and  $10 \times 9$  PFU mL<sup>-1</sup> respectively. Biofilms without treatment (untreated) were used as control. LIVE/DEAD® Bacterial Viability Kit was used showing dead (PI, red) and live (SYTO® 9, green) biofilm associated bacteria in samples representative of each treatment group.
